# Supplementary material
Source: Research Square preprint supplement (doi:10.21203/rs.3.rs-9998005/v1)
Supplement: Supplementary file 1 [file 1b208c09000f6d5b4384b3ae.pdf]

## Supplementary Information

### Untargeted cord blood metabolomics reveals altered lipid metabolism in neonates with gastroschisis

Hsuan-Yuan Wang PhD<sup>1,2</sup>, Bryan T. Oshiro MD<sup>3</sup>, Neela Rahseparian<sup>1,2</sup>, Lauren Crabtree<sup>3</sup>, Joshua F. Robinson PhD<sup>2</sup>, Stephanie L Gaw MD, PhD<sup>1,2\*</sup>, Ciprian Gheorghe, MD, PhD<sup>4\*</sup>

<sup>1</sup> Division of Maternal Fetal Medicine, Department of Obstetrics, Gynecology & Reproductive Sciences, University of California, San Francisco, San Francisco, CA

<sup>2</sup> Center for Reproductive Sciences, Department of Obstetrics, Gynecology & Reproductive Sciences, University of California, San Francisco, San Francisco, CA

<sup>3</sup> Department of Gynecology and Obstetrics, Loma Linda University School of Medicine, Loma Linda, CA

<sup>4</sup> Division of Maternal-Fetal Medicine, Department of Gynecology and Obstetrics, Loma Linda University School of Medicine, Loma Linda, CA

# Supplementary Figure

## Supplementary Figure 1.

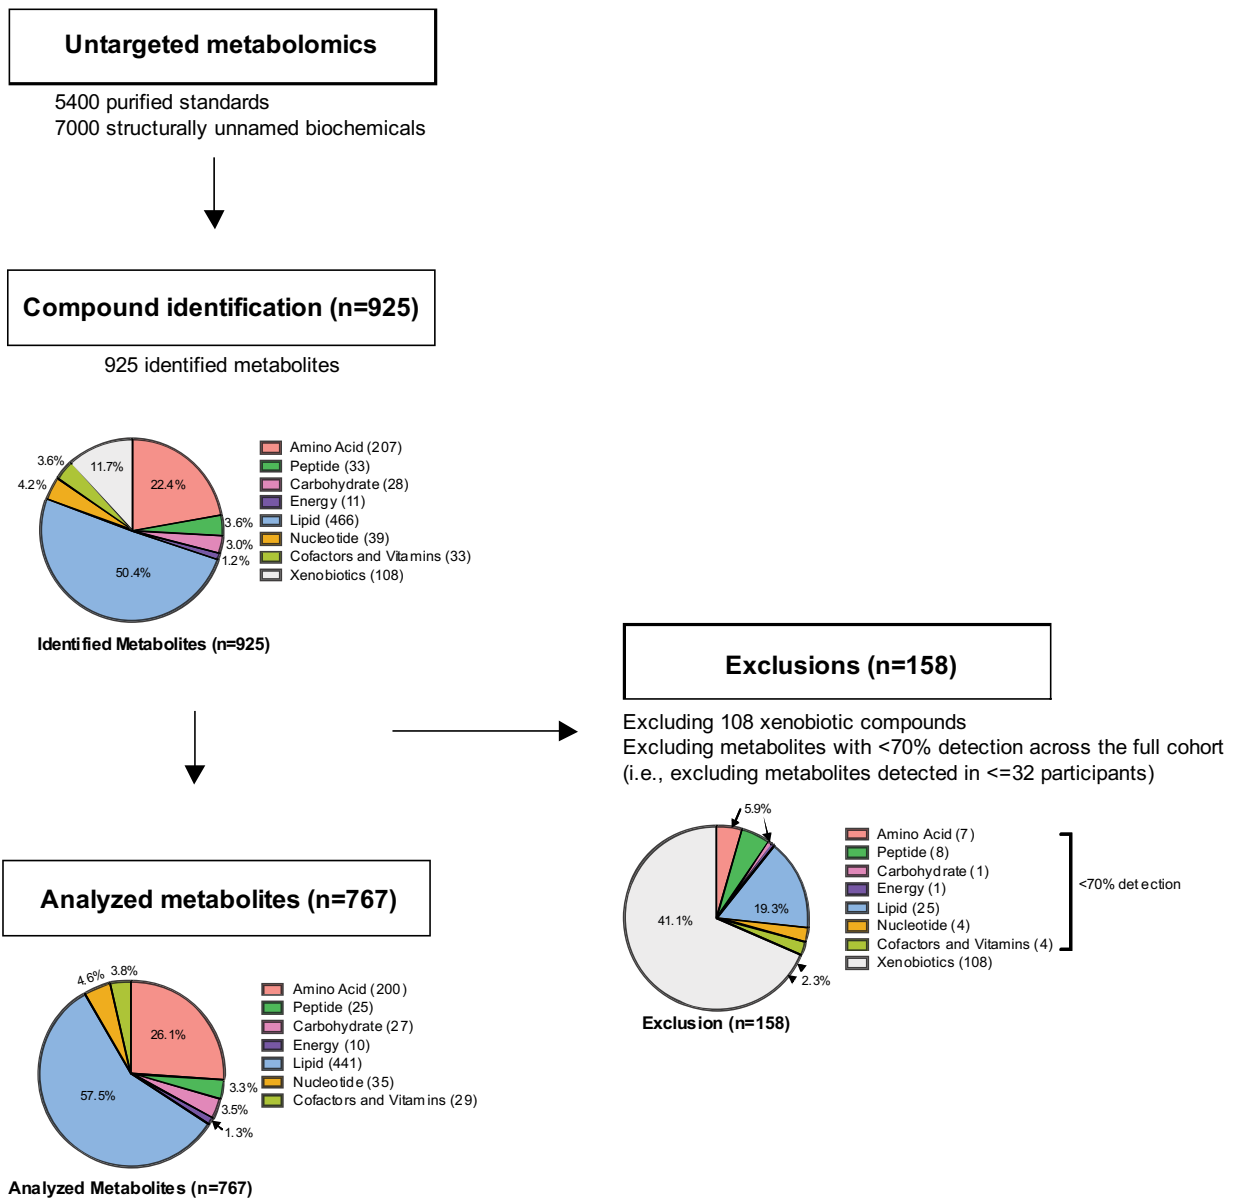

**Supplementary Figure 1.** Of approximately 5400 purified standards and 7000 structurally unnamed biochemicals in the Metabolon reference library, 925 metabolites were identified. After exclusion of all xenobiotics and metabolites detected in fewer than 70% of the cohort, 767 endogenous metabolites were retained for downstream analyses.

## Supplementary Tables

**Supplementary Table 1.** Sensitivity of the 53 cohort significant metabolites to gestational age.

| Sub pathway                                | Biochemical                        | FC    | p-value               | q-value |
|--------------------------------------------|------------------------------------|-------|-----------------------|---------|
| <b>Hemoglobin and Porphyrin Metabolism</b> | biliverdin                         | 0.43  | $3.65 \times 10^{-5}$ | 0.0003  |
|                                            | bilirubin (Z,Z)                    | 0.43  | 0.020                 | 0.026   |
|                                            | bilirubin (E,Z or Z,E)             | 0.46  | 0.003                 | 0.007   |
|                                            | bilirubin (E,E)                    | 0.65  | 0.002                 | 0.006   |
| <b>Polyamine Metabolism</b>                | spermidine                         | 1.54  | 0.035                 | 0.038   |
|                                            | N-acetylputrescine                 | 1.45  | 0.0003                | 0.002   |
|                                            | N1,N12-diacetylspermine            | 1.43  | 0.002                 | 0.005   |
|                                            | 4-acetamidobutanoate               | 1.32  | 0.002                 | 0.005   |
|                                            | 5-methylthioadenosine (MTA)        | 1.32  | 0.034                 | 0.037   |
| <b>Pyrimidine Metabolism</b>               | orotate                            | 2.52  | $2.35 \times 10^{-5}$ | 0.0003  |
|                                            | cytosine                           | 1.96  | 0.045                 | 0.046   |
|                                            | N-carbamoylaspartate               | 1.49  | 0.004                 | 0.009   |
|                                            | 3-ureidopropionate                 | 1.46  | 0.007                 | 0.012   |
|                                            | 3-(3-amino-3-carboxypropyl)uridine | 1.35  | 0.0002                | 0.0009  |
|                                            | N-acetyl-beta-alanine              | 1.33  | 0.002                 | 0.005   |
|                                            | 2'-O-methylcytidine                | 1.25  | 0.008                 | 0.013   |
|                                            | uridine                            | 1.24  | 0.007                 | 0.011   |
| orotidine                                  | 1.23                               | 0.035 | 0.038                 |         |
| <b>Fibrinogen Cleavage Peptide</b>         | fibrinopeptide A (5-16)            | 0.17  | 0.0005                | 0.002   |
|                                            | fibrinopeptide B (1-13)            | 0.22  | 0.0002                | 0.001   |
|                                            | fibrinopeptide A, des-ala(1)       | 0.30  | 0.007                 | 0.011   |
|                                            | fibrinopeptide B (1-11)            | 0.30  | 0.045                 | 0.047   |

*For each metabolite the full cohort fold change and the fold change (FC) and p-value within term births are reported, together with whether the metabolite remained significant when the case versus control comparison was restricted to term births.*

**Supplementary Table 2. Lower fatty acid (FA) in neonates with gastroschisis.**

| Sub pathway                        | Biochemical                                 | FC   | p-value               | q-value               |
|------------------------------------|---------------------------------------------|------|-----------------------|-----------------------|
| <b>Long Chain Saturated FA</b>     | myristate (14:0)                            | 0.59 | 0.0002                | 0.0013                |
|                                    | pentadecanoate (15:0)                       | 0.69 | 0.0003                | 0.0016                |
|                                    | palmitate (16:0)                            | 0.64 | 0.0025                | 0.006                 |
|                                    | margarate (17:0)                            | 0.62 | $6.14 \times 10^{-5}$ | 0.0005                |
|                                    | stearate (18:0)                             | 0.70 | 0.0031                | 0.007                 |
|                                    | nonadecanoate (19:0)                        | 0.69 | $8.89 \times 10^{-5}$ | 0.0006                |
|                                    | arachidate (20:0)                           | 0.82 | 0.0079                | 0.013                 |
| <b>Medium Chain FA</b>             | caproate (6:0)                              | 0.80 | 0.048                 | 0.049                 |
|                                    | caprate (10:0)                              | 0.79 | 0.028                 | 0.032                 |
|                                    | 10-undecenoate (11:1n1)                     | 0.76 | 0.019                 | 0.025                 |
|                                    | laurate (12:0)                              | 0.57 | $7.10 \times 10^{-5}$ | 0.0005                |
| <b>Long Chain MUFA</b>             | oleate/vaccenate (18:1)                     | 0.51 | 0.004                 | 0.008                 |
|                                    | 10-nonadecenoate (19:1n9)                   | 0.56 | 0.0005                | 0.002                 |
|                                    | eicosenoate (20:1)                          | 0.57 | 0.017                 | 0.024                 |
|                                    | 10-heptadecenoate (17:1n7)                  | 0.62 | 0.002                 | 0.005                 |
| <b>Long Chain PUFA (n3 and n6)</b> | linoleate (18:2n6)                          | 0.45 | 0.0004                | 0.002                 |
|                                    | linolenate (18:3n3 or 6)                    | 0.49 | 0.0004                | 0.002                 |
|                                    | eicosapentaenoate (EPA; 20:5n3)             | 0.45 | 0.0003                | 0.002                 |
|                                    | docosapentaenoate (n3 DPA; 22:5n3)          | 0.51 | $3.58 \times 10^{-5}$ | 0.0003                |
|                                    | docosahexaenoate (DHA; 22:6n3)              | 0.62 | 0.002                 | 0.005                 |
|                                    | hexadecadienoate (16:2n6)                   | 0.61 | 0.001                 | 0.004                 |
|                                    | dihomo-linoleate (20:2n6)                   | 0.63 | 0.0007                | 0.003                 |
|                                    | adrenate (22:4n6)                           | 0.63 | 0.021                 | 0.027                 |
|                                    | nisinate (24:6n3)                           | 0.62 | 0.006                 | 0.011                 |
|                                    | dihomo-linolenate (20:3n3 or n6)            | 0.76 | 0.024                 | 0.030                 |
|                                    | mead acid (20:3n9)                          | 1.32 | 0.014                 | 0.020                 |
|                                    | docosatrienoate (22:3n6)                    | 1.99 | 0.001                 | 0.004                 |
| <b>Branched Chain FA</b>           | (14 or 15)-methylpalmitate (a17:0 or i17:0) | 0.54 | $9.99 \times 10^{-6}$ | 0.0002                |
|                                    | (16 or 17)-methylstearate (a19:0 or i19:0)  | 0.50 | $7.22 \times 10^{-7}$ | $2.29 \times 10^{-5}$ |
| <b>Fatty Acid, Dicarboxylate</b>   | hydroxy-CMPF                                | 0.21 | 0.005                 | 0.010                 |
|                                    | octadecanedioate (C18-DC)                   | 0.54 | 0.002                 | 0.005                 |
|                                    | eicosanedioate (C20:1-DC)                   | 0.56 | $3.63 \times 10^{-7}$ | $1.43 \times 10^{-5}$ |
|                                    | azelate (C9-DC)                             | 0.57 | 0.002                 | 0.005                 |
|                                    | 3-CMPFP                                     | 0.58 | $1.31 \times 10^{-5}$ | 0.0002                |
|                                    | glutarate (C5-DC)                           | 0.64 | 0.027                 | 0.031                 |
|                                    | octadecenedioate (C18:1-DC)                 | 0.67 | 0.006                 | 0.011                 |
|                                    | eicosanedioate (C20-DC)                     | 0.67 | 0.001                 | 0.004                 |
|                                    | 4-hydroxy-2-oxoglutaric acid                | 0.69 | 0.019                 | 0.025                 |
|                                    | octadecadienedioate (C18:2-DC)              | 0.73 | 0.014                 | 0.020                 |

|                                    |                         |      |                       |                       |
|------------------------------------|-------------------------|------|-----------------------|-----------------------|
|                                    | dodecanedioate (C12-DC) | 0.74 | 0.036                 | 0.039                 |
|                                    | heptenedioate (C7:1-DC) | 0.75 | 0.029                 | 0.033                 |
|                                    | 2-hydroxyadipate        | 1.33 | 0.020                 | 0.026                 |
| <b>Fatty Acid,<br/>Monohydroxy</b> | 2-hydroxylaurate        | 0.53 | $6.19 \times 10^{-8}$ | $5.68 \times 10^{-6}$ |
|                                    | 13-HODE + 9-HODE        | 0.61 | 0.0007                | 0.003                 |
|                                    | 3-hydroxystearate       | 0.69 | 0.035                 | 0.038                 |
|                                    | 3-hydroxypalmitate      | 0.74 | 0.007                 | 0.012                 |
|                                    | 2-hydroxymyristate      | 0.74 | 0.003                 | 0.007                 |
|                                    | 3-hydroxymyristate      | 0.74 | 0.010                 | 0.015                 |
|                                    | 2-hydroxystearate       | 1.19 | 0.016                 | 0.023                 |
|                                    | 2-hydroxyarachidate     | 1.61 | $4.97 \times 10^{-5}$ | 0.0004                |
|                                    | 2-hydroxybehenate       | 1.60 | $7.95 \times 10^{-5}$ | 0.0006                |

*Fold change (FC) represents the ratio of mean metabolite levels in gastroschisis (n=23) relative to control (n=23). Statistical significance was assessed by Welch's two sample t test. Only metabolites with  $p < 0.05$  are shown. Asterisks (\*) denote metabolites identified with lower confidence.*

**Supplementary Table 3. Higher fatty acid downstream metabolism pathways in neonates born with gastroschisis.**

| Sub pathway                                 | Biochemical                               | FC    | p-value               | q-value               |
|---------------------------------------------|-------------------------------------------|-------|-----------------------|-----------------------|
| <b>Fatty Acid, Amide</b>                    | margaramide (17:0)                        | 47.19 | 0.022                 | 0.027                 |
|                                             | oleamide                                  | 14.19 | 0.038                 | 0.040                 |
|                                             | linolenamide (18:3)                       | 11.20 | 0.014                 | 0.020                 |
|                                             | palmitamide (16:0)                        | 9.01  | 0.042                 | 0.044                 |
|                                             | linoleamide (18:2n6)                      | 8.16  | 0.029                 | 0.033                 |
|                                             | stearamide (18:0)                         | 6.63  | 0.015                 | 0.021                 |
|                                             | eicosadienamide (20:2)                    | 4.41  | 0.006                 | 0.011                 |
| <b>Acyl Carnitine, Long Chain Saturated</b> | arachidoylcarnitine (C20)                 | 2.58  | $1.42 \times 10^{-8}$ | $1.73 \times 10^{-6}$ |
|                                             | stearoylcarnitine (C18)                   | 1.80  | $4.79 \times 10^{-7}$ | $1.73 \times 10^{-5}$ |
|                                             | lignoceroylcarnitine (C24)                | 1.33  | 0.023                 | 0.029                 |
|                                             | palmitoylcarnitine (C16)                  | 1.30  | 0.005                 | 0.010                 |
|                                             | cerotoylcarnitine (C26)                   | 1.27  | 0.006                 | 0.011                 |
|                                             | margaroylcarnitine (C17)                  | 1.22  | 0.031                 | 0.035                 |
| <b>Acyl Carnitine, Monounsaturated</b>      | nervonoylcarnitine (C24:1)                | 2.11  | 0.0001                | 0.0008                |
|                                             | eicosenoylcarnitine (C20:1)               | 1.89  | 0.002                 | 0.006                 |
|                                             | ximenoylcarnitine (C26:1)                 | 1.84  | $8.26 \times 10^{-5}$ | 0.0006                |
|                                             | cis-4-decenoylcarnitine (C10:1)           | 1.42  | $5.97 \times 10^{-5}$ | 0.0005                |
|                                             | oleoylcarnitine (C18:1)                   | 1.41  | 0.004                 | 0.008                 |
|                                             | 3-decenoylcarnitine                       | 1.32  | 0.010                 | 0.015                 |
|                                             | 5-dodecenoylcarnitine (C12:1)             | 1.27  | 0.029                 | 0.033                 |
| <b>Acyl Carnitine, Medium Chain</b>         | hexanoylcarnitine (C6)                    | 1.47  | 0.003                 | 0.007                 |
|                                             | octanoylcarnitine (C8)                    | 1.37  | 0.001                 | 0.004                 |
|                                             | decanoylcarnitine (C10)                   | 1.24  | 0.021                 | 0.027                 |
| <b>Acyl Carnitine, Polyunsaturated</b>      | adrenoylcarnitine (C22:4)                 | 1.37  | 0.044                 | 0.046                 |
|                                             | dihomo-linolenoylcarnitine (C20:3n3 or 6) | 1.36  | 0.010                 | 0.015                 |
|                                             | dihomo-linoleoylcarnitine (C20:2)         | 1.34  | 0.019                 | 0.025                 |
|                                             | arachidonoylcarnitine (C20:4)             | 1.27  | 0.026                 | 0.031                 |
| <b>Acyl Choline</b>                         | palmitoloelycholine                       | 2.39  | $9.91 \times 10^{-5}$ | 0.0007                |
|                                             | dihomo-linolenoyl-choline                 | 1.96  | 0.0007                | 0.003                 |
|                                             | oleoylcholine                             | 1.69  | 0.0007                | 0.003                 |
|                                             | arachidonoylcholine                       | 1.50  | 0.004                 | 0.008                 |
|                                             | palmitoylcholine                          | 1.46  | 0.004                 | 0.008                 |
|                                             | stearoylcholine                           | 1.41  | 0.008                 | 0.013                 |
| <b>Acyl Glycine</b>                         | picolinoylglycine                         | 1.42  | 0.049                 | 0.050                 |
|                                             | N-palmitoylglycine                        | 0.74  | 0.006                 | 0.011                 |

*Fold change (FC) represents the ratio of mean metabolite levels in gastroschisis (n=23) relative to control (n=23). Statistical significance was assessed by Welch's two sample t test. Only metabolites with  $p < 0.05$  are shown.*

**Supplementary Table 4. Higher glycerophospholipid metabolism but lower plasmalogen in neonates born with gastroschisis**

| <b>Sub pathway</b>                    | <b>Biochemical</b>                                 | <b>FC</b> | <b>p-value</b>        | <b>q-value</b> |
|---------------------------------------|----------------------------------------------------|-----------|-----------------------|----------------|
| <b>Lysophospholipid</b>               | 1-stearoyl-GPE (18:0)                              | 1.69      | $4.96 \times 10^{-6}$ | 0.0001         |
|                                       | 1-palmitoyl-GPE (16:0)                             | 1.37      | 0.0011                | 0.0036         |
|                                       | 1-oleoyl-GPE (18:1)                                | 1.58      | $1.48 \times 10^{-5}$ | 0.0002         |
|                                       | 1-stearoyl-GPC (18:0)                              | 1.40      | 0.0024                | 0.006          |
|                                       | 1-palmitoyl-GPC (16:0)                             | 1.26      | 0.003                 | 0.0062         |
| <b>Phosphatidyl-choline (PC)</b>      | 1-palmitoyl-2-oleoyl-GPC (16:0/18:1)               | 1.26      | $3.20 \times 10^{-5}$ | 0.0003         |
| <b>Phosphatidyl-ethanolamine (PE)</b> | 1-palmitoyl-2-oleoyl-GPE (16:0/18:1)               | 1.09      | 0.03                  | 0.033          |
| <b>Plasmalogen</b>                    | 1-(1-enyl-palmitoyl)-2-linoleoyl-GPE (P-16:0/18:2) | 0.33      | $8.08 \times 10^{-5}$ | 0.0006         |
| <b>Plasmalogen</b>                    | 1-(1-enyl-stearoyl)-2-linoleoyl-GPE (P-18:0/18:2)  | 0.29      | 0.0082                | 0.013          |

*Fold change (FC) represents the ratio of mean metabolite levels in gastroschisis (n=23) relative to control (n=23). Statistical significance was assessed by Welch's two sample t test. Representative significant metabolites are shown.*

**Supplementary Table 5. Higher ceramide metabolism in neonates born with gastroschisis.**

| Sub pathway                     | Biochemical                                   | FC   | p-value               | q-value               |
|---------------------------------|-----------------------------------------------|------|-----------------------|-----------------------|
| <b>Ceramides</b>                | N-stearoyl-sphingosine (d18:1/18:0)           | 2.46 | $7.52 \times 10^{-7}$ | $2.29 \times 10^{-5}$ |
|                                 | ceramide (d16:1/24:1, d18:1/22:1)             | 2.14 | $8.75 \times 10^{-6}$ | 0.0002                |
|                                 | ceramide (d18:1/20:0, d16:1/22:0, d20:1/18:0) | 1.84 | $3.29 \times 10^{-5}$ | 0.0003                |
|                                 | N-stearoyl-sphingadienine (d18:2/18:0)        | 1.77 | $3.66 \times 10^{-5}$ | 0.0003                |
|                                 | N-palmitoyl-sphingosine (d18:1/16:0)          | 1.72 | $8.73 \times 10^{-6}$ | 0.0002                |
|                                 | ceramide (d18:1/17:0, d17:1/18:0)             | 1.56 | 0.006                 | 0.011                 |
|                                 | ceramide (d18:2/24:1, d18:1/24:2)             | 1.53 | $2.33 \times 10^{-5}$ | 0.0003                |
|                                 | N-palmitoyl-sphingadienine (d18:2/16:0)       | 1.35 | 0.003                 | 0.007                 |
| <b>Dihydroceramides</b>         | N-palmitoyl-sphinganine (d18:0/16:0)          | 2.61 | $1.25 \times 10^{-7}$ | $7.62 \times 10^{-6}$ |
|                                 | N-stearoyl-sphinganine (d18:0/18:0)           | 2.50 | $3.29 \times 10^{-5}$ | 0.0003                |
| <b>Sphingomyelins</b>           | sphingomyelin (d18:1/18:0, d18:0/18:1)        | 1.29 | 0.015                 | 0.021                 |
|                                 | sphingomyelin (d18:1/20:0, d16:1/22:0)        | 1.22 | 0.047                 | 0.048                 |
| <b>Hexosylceramides (HCER)</b>  | glycosyl-N-(2-hydroxynervonoyl)-sphingosine   | 3.17 | 0.001                 | 0.004                 |
|                                 | glycosyl ceramide (d18:1/20:0, d16:1/22:0)    | 0.55 | 0.002                 | 0.005                 |
|                                 | glycosyl-N-stearoyl-sphingosine (d18:1/18:0)  | 0.66 | 0.006                 | 0.011                 |
| <b>Lactosylceramides (LCER)</b> | lactosyl-N-palmitoyl-sphingosine (d18:1/16:0) | 0.63 | 0.003                 | 0.007                 |
|                                 | lactosyl-N-nervonoyl-sphingosine (d18:1/24:1) | 0.74 | 0.038                 | 0.040                 |

*Fold change (FC) represents the ratio of mean metabolite levels in gastroschisis (n=23) relative to control (n=23). Statistical significance was assessed by Welch's two sample t test. Only metabolites with  $p < 0.05$  are shown.*

**Supplementary Table 6. Lower androgenic and estrogenic metabolism in neonates born with gastroschisis.**

| <b>Sub pathway</b>         | <b>Biochemical</b>                                           | <b>FC</b> | <b>p-value</b>        | <b>q-value</b>        |
|----------------------------|--------------------------------------------------------------|-----------|-----------------------|-----------------------|
| <b>Androgenic Steroids</b> | androsterone sulfate                                         | 0.13      | 0.027                 | 0.031                 |
|                            | androstenediol (3 $\beta$ ,17 $\beta$ ) monosulfate (2)      | 0.22      | $2.26 \times 10^{-6}$ | $5.51 \times 10^{-5}$ |
|                            | 5 $\alpha$ -androstan-3 $\beta$ ,17 $\alpha$ -diol disulfate | 0.30      | $1.14 \times 10^{-5}$ | 0.0002                |
|                            | 5 $\alpha$ -androstan-3 $\beta$ ,17 $\beta$ -diol disulfate  | 0.40      | $1.12 \times 10^{-5}$ | 0.0002                |
|                            | androstenediol (3 $\beta$ ,17 $\beta$ ) monosulfate (1)      | 0.41      | 0.0003                | 0.001                 |
|                            | androstenediol (3 $\beta$ ,17 $\beta$ ) disulfate (1)        | 0.47      | 0.010                 | 0.015                 |
|                            | androstenediol (3 $\alpha$ ,17 $\alpha$ ) monosulfate (2)    | 0.51      | 0.008                 | 0.013                 |
|                            | androsterone glucuronide                                     | 0.55      | 0.004                 | 0.008                 |
|                            | 16 $\alpha$ -hydroxy DHEA 3-sulfate                          | 0.56      | 0.016                 | 0.022                 |
|                            | androstenediol (3 $\beta$ ,17 $\beta$ ) disulfate (2)        | 0.56      | 0.005                 | 0.009                 |
|                            | dehydroepiandrosterone sulfate (DHEA-S)                      | 0.60      | 0.002                 | 0.005                 |
| <b>Estrogenic Steroids</b> | estriol-3-glucuronide                                        | 0.21      | $1.50 \times 10^{-7}$ | $7.84 \times 10^{-6}$ |
|                            | estrone 3-sulfate                                            | 0.39      | 0.018                 | 0.024                 |
|                            | estriol 3-sulfate                                            | 0.58      | 0.019                 | 0.025                 |

*Fold change (FC) represents the ratio of mean metabolite levels in gastroschisis (n=23) relative to control (n=23). Statistical significance was assessed by Welch's two sample t test. Only metabolites with  $p < 0.05$  are shown.*

**Supplementary Table 7. Increased secondary bile acid metabolism in neonates born with gastroschisis.**

| <b>Subpathway</b>                     | <b>Biochemical</b>                    | <b>FC</b> | <b>p-value</b>         | <b>q-value</b>        |
|---------------------------------------|---------------------------------------|-----------|------------------------|-----------------------|
| <b>Primary Bile Acid Metabolism</b>   | chenodeoxycholate                     | 0.28      | $3.14 \times 10^{-10}$ | $1.15 \times 10^{-7}$ |
|                                       | cholate                               | 0.56      | 0.028                  | 0.032                 |
|                                       | taurocholate                          | 1.77      | 0.032                  | 0.035                 |
| <b>Secondary Bile Acid Metabolism</b> | deoxycholate                          | 0.34      | $6.52 \times 10^{-10}$ | $1.19 \times 10^{-7}$ |
|                                       | lithocholate sulfate (1)              | 0.44      | 0.016                  | 0.022                 |
|                                       | hyocholate                            | 0.51      | 0.003                  | 0.006                 |
|                                       | taurochenolate sulfate*               | 2.26      | 0.0001                 | 0.0008                |
|                                       | taurochenodeoxycholic acid 3-sulfate  | 2.59      | 0.005                  | 0.010                 |
|                                       | tauroolithocholate 3-sulfate          | 3.25      | 0.026                  | 0.030                 |
|                                       | glycodeoxycholate 3-sulfate           | 3.54      | 0.014                  | 0.020                 |
|                                       | tauroursodeoxycholic acid sulfate (1) | 4.22      | $1.47 \times 10^{-5}$  | 0.0002                |
|                                       | taurodeoxycholic acid 3-sulfate       | 4.38      | 0.0003                 | 0.002                 |
| taurohyocholate*                      | 2.09                                  | 0.020     | 0.026                  |                       |

*Fold change (FC) represents the ratio of mean metabolite levels in gastroschisis (n=23) relative to control (n=23). Statistical significance was assessed by Welch's two sample t test. Only metabolites with  $p < 0.05$  are shown.*
